# Supplementary material
Source: PubMed Central journal article supplement (PMC379252)
Supplement: mbc_15_4_1519__3.pdf [file mbc_15_4_1519__3.pdf]

**Supplementary Table 1.** *PCR primers used in this study*

| Primer      | Sequence                                                                                                  |
|-------------|-----------------------------------------------------------------------------------------------------------|
| ASE1 5' KO  | 5'-TCTACTACAGTTATACCGCATATGAACCCCTTCTTTAGCAACACCGTTGACTGTGTCGACC<br>ATGGCAGCTGAAGCTTCGTACGC-3' (83mer)    |
| ASE1 3' KO  | 5'-GAATGTTTAATTGAAATTTACCTTCTGGCGACATGGAAAGTTTATATATGCTGTGCTCAG<br>GTTTCGCATAGGCCACTAGTGGATCTG-3' (86mer) |
| ASE1 5' CK  | 5'-GCAAAGATACGAACAAACGG-3' (20mer)                                                                        |
| ASE1 3' CK  | 5'-TCCAGAGTCACGGTGCAATG-3' (20mer)                                                                        |
| BUB2 5' GFP | 5'- TATGACCTATTGGTAGACCACTTGACCGACCCAGACATATATATACCGGCACGGATCCCCGGGTAAATTA-3' (71mer)                     |
| BUB2 3' GFP | 5'- ACACATACAGACATATAAACGTTGTAGAATTAACGATAAAAATATAAGAATTCGAGCTCGTTTAAAC-3' (67mer)                        |
| BUB2 5' CK  | 5'- GCTGGGCGTCGGGTTTCATCG-3' (20mer)                                                                      |
| CDC15-GFP5' | 5'-CCAAAGATAAAAAGTGCAGGCTTTTCCGTCCCCATTACAACATTTCAAACAAGTAAAGGAGAAGAACT-3'(67mer)                         |
| CDC15-GFP3' | 5'-CAGTATTGGAAGGTTTACAAATTCTATATAGTGTTAATGTAATGCTGATGGCGGCGTTAGTATCG-3'(66mer)                            |
| CDC15-CHK5' | 5'-GACGACGCAAAGACAGCAGC-3'(20mer)                                                                         |
| KAR9-DELUP  | 5'-CCGCACGAATCTTTGTCTGTAACAGCCTTAAAGATTTTCAGTAGCACTGCCGCATAGGCCACTAGTGGATCTG-3'(72mer)                    |
| KAR9-DELDN  | 5'-GGGGTTTTATCTAAACGCCCTTCTCTTGGTGAAAGTAACTGTGATAAGGCAGCTGAAGCTTCGTACGC-3'(68mer)                         |
| KIP2-5'     | 5'-TCAAGGCAAACATAGAACACTTGATAAAAATTTCTTACCATAATACCACCATTCGAGCTGAAGCTTCGTACGC-3'(71mer)                    |
| KIP2-3'     | 5'-CAGAACAATCCGCACAAGGAAAAAAGCACCCGAGATCTGGGACCCTCACCTAAGCATAGGCCACTAGTGGATCTG-3'(75mer)                  |
| KIP2UPCHK   | 5'-TAGGCTGCAGAGTTCA-3'(16mer)                                                                             |
| KIP2DNCHK   | 5'-GCCTTTTATGCGCTGTCT-3'(18mer)                                                                           |
| KIP3::KAN5' | 5'-CATATCCCTGATTGCATCGTTTATCTGATTATCATTTCATTGCATTCTTCAGCTGAAGCTTCGTACGC-3' (69mer)                        |
| KIP3::KAN3' | 5'-GCGTTTAATGCTGGCGGAAAGAAGTTATATTCGATAGTTTACGTAGGATAGCATAGGCCACTAGTGGATCTG-3' (72mer)                    |
| KIP3-5'     | 5'-CTTGGCCAGAGACTTGGGCTG-3'(21mer)                                                                        |
| KIP3-3'1    | 5'-CACTAGAATTACCCATCGTTTCAGG-3'(25mer)                                                                    |
| LTE1 5' KO  | 5'-CCCTGAACCATGGAAATATTTAGCCAGAAAGATTACTACCCGACTCCATCCTCCAGCTGAAGCTTCGTACGC-3' (72mer)                    |
| LTE1 3' KO  | 5'- GGACGCAACCCACCAGTGGATTCACAGAGTTAAGTAGATTTCTTATTGTAGGCATAGGCCACTAGTGGATCTG-3' (73mer)                  |
| LTE1 5' CK  | 5'- GTACTCGTGTTATTCGCTCG-3' (20mer)                                                                       |
| LTE1 3' CK  | 5'- ACATGTATGTATGCTCCATC-3' (20mer)                                                                       |
| F-LTE1-3448 | 5'-GCCTCGAGGACGTGTCAGCTAATGTTG-3'(27mer)                                                                  |
| R-LTE1-4503 | 5'-GCGGATCCGAGGTGGTGGTGGTTGTGGATAGTTTCATTAATC-3'(41mer)                                                   |
| TEM1-GFP 5' | 5'-AGCCCTCCTCGTCGCCCTCATCTAAGGCACCATCGCCGGGGTTAATACAAGTAAAGGAGAAGAACT-3'(67mer)                           |
| TEM1-GFP3'  | 5'-GATATTGTGGATGTACATACTTCTATATCTCCTTAAAGCTATTGTGTAGCATGGCGGCGTTAGTATCG-3'(69mer)                         |
| TEM1-CHK5'  | 5'-GGTGTATGGTGTATGGATG-3'(19mer)                                                                          |
| TEM1-CHK3'  | 5'-GACGACGCAAAGACAGCAGC-3'(20mer)                                                                         |
