# Supplementary material
Source: PubMed Central journal article supplement (PMC379252)

# Supplementary Figure One

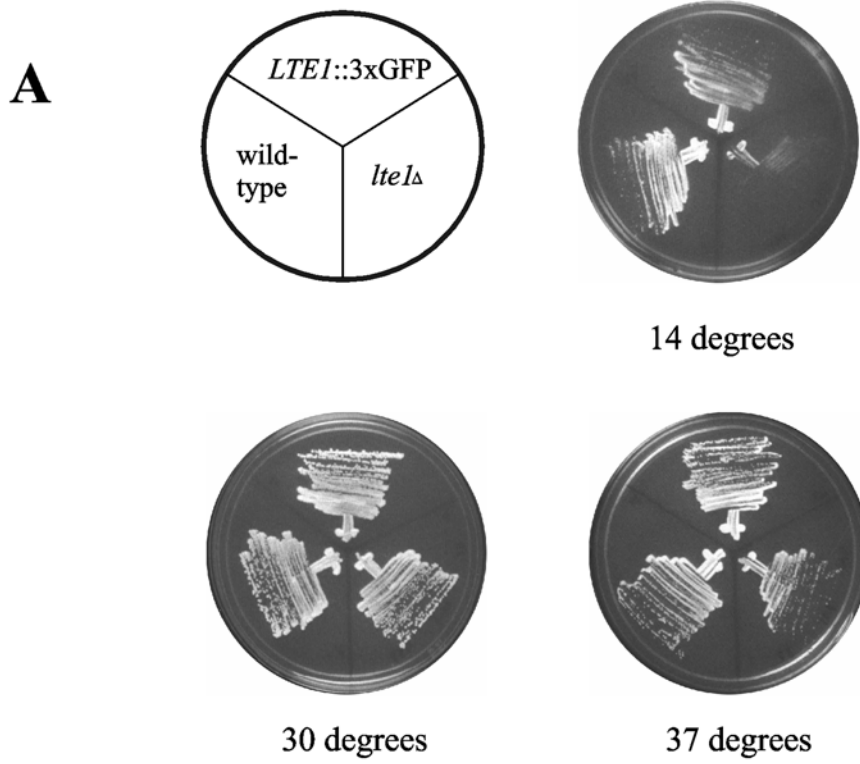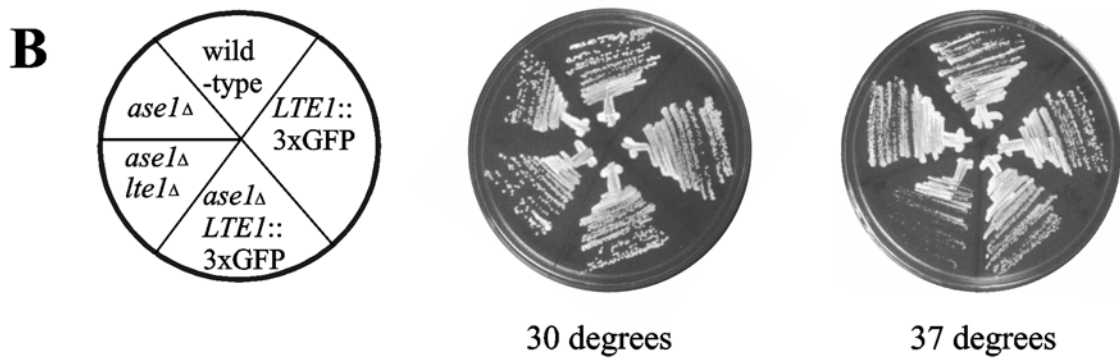

Supplement: mbc_15_4_1519__1.pdf [file mbc_15_4_1519__1.pdf]

# Supplementary Figure Two

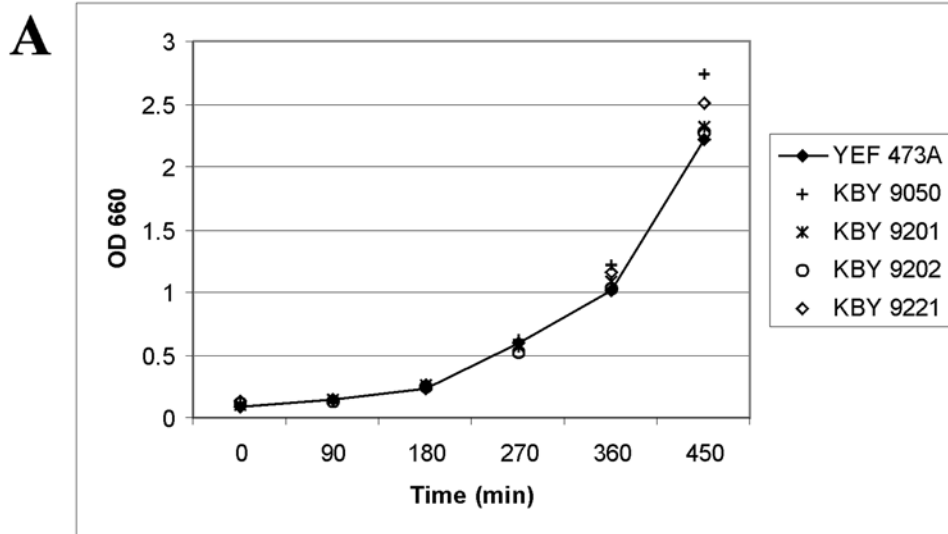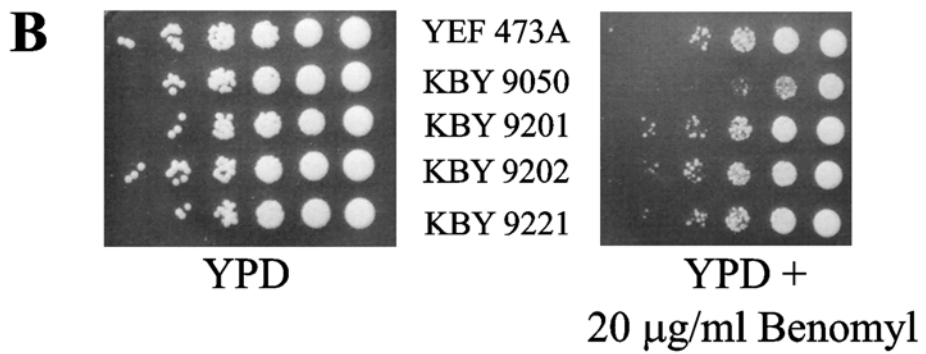

Supplement: mbc_15_4_1519__2.pdf [file mbc_15_4_1519__2.pdf]
